# Supplementary material for: Discovery of a new evolutionarily conserved short linear F-actin binding motif
Source: Research Square preprint supplement (doi:10.21203/rs.3.rs-6464525/v1), 2025-05-16
Supplement: Supplementary file 2 [file 78483f5a566d80b1016696e6.docx]

| **Type** | **Module** | **Genes containing the motif, examples** | **Function** | **InterPro** |
| --- | --- | --- | --- | --- |
| SLiM | Wiskott-Aldrich homology 2 (WH2) domain1 | Cobl*a*, DIAP1*a*, FMNL3*a*, INF2*a*, LMOD1-3*a*, MTSS1*a*, WASH1*a*, WASL*a*, WAS*a*, WASF1-3*a*, WHAMM*a*, spir*b*, capu*b*, vopL*c*, vopF*c*, sca2*d*, rickA*d*, VRP1*e* | binding G-actin, nucleation | IPR003124 |
| IDD | Cortactin repeat domain2,3 | CTTN*a*, HCLS1*a* | binding F-actin | IPR003134 |
| globular | Formin homology-2 (FH2) domain4,5 | GRID2IP*a*, DIAPH1*a*, INF2*a*, DIAPH2*a*, FMNL1*a*, capu*b*, dia*b*, forA*i* | regulating F-actin polymerisation | IPR042201 |
|  | Actin-depolymerising factor homology (ADF‑H) domain6 | CFL1-2*a*, DSTN*a*, TWF1-2*a*, ADF1-12*g*, actp*h,* coaAi | severing of F-actin | IPR002108 |
|  | Calponin Homology (CH) domain7 | UTRN*a*, DMD*a* | single CH domain: binding F-actin | IPR001715 |
| PLS1-3*a*, ACTN1-4*a*, SPTB*a*, FLNA*a*, PLEC*a*, TAGLN*a*, CNN1*a* | tandem CH domain: crosslinking/ bundling F-actin |
|  | Fascin domain8 | FSCN1-3*a*, hatA*i* | crosslinking/bundling F-actin | IPR022768 |
|  | Gelsolin-like domain9,10 | GSN*a*, VIL1*a*, SEC23*e*, SEC24*e*, sevA*i* | barbed end capping and severing of F-actin | IPR007123 |
|  | Profilin (PFN)11 | PFN1-2*a*, Lokiarch_47830*j* | binding G-actin, inhibiting F-actin polymerisation | IPR005455 |
| *a human species, b drosophila species, c vibrio species, d rickettsia species, e saccharomyces species, f metazoan, g Arabidopsis species, h Acanthamoeba species, i Dictyostelium species, j Lokiarchaeum species* | | | | |

**Supplementary Table 1.** Representative examples of identified actin-binding domains assigned into short linear motifs (SLiMs), intrinsically disordered domains (IDDs), and globular domains.

| **No.** | **Name** | **Expression Syste,** |
| --- | --- | --- |
| 1 | 1_pSF421-10xHis-GFP-TEV-ITPKA-FL | bacterial protein expression |
| 2 | 2_pSF421_10xHis_GFP_TEV | bacterial protein expression |
| 3 | 3_pSF421_10xHis_GFP_TEV_10xHis | bacterial protein expression |
| 4 | 4_pSF421_Control_GFP_TEV_10xHis | bacterial protein expression |
| 5 | 5_pSF421_Lifeact_WT_GFP_TEV_10xHis | bacterial protein expression |
| 6 | 6_pSF421_Lifeact_Mut_GFP_TEV_10xHis | bacterial protein expression |
| 7 | 7_pSF421_ESPNL_GFP_TEV_10xHis | bacterial protein expression |
| 8 | 8_pSF421_SHROOM3_GFP_TEV_10xHis | bacterial protein expression |
| 9 | 9_pSF421_USP54_GFP_TEV_10xHis | bacterial protein expression |
| 10 | 10_pSF421_PPP1R9A_GFP_TEV_10xHis | bacterial protein expression |
| 11 | 11_pSF421_CEFIP_GFP_TEV_10xHis | bacterial protein expression |
| 12 | 12_pSF421_CGNL_GFP_TEV_10xHis | bacterial protein expression |
| 13 | 13_pSF421_SHROOM3_M2_GFP_TEV_10xHis | bacterial protein expression |
| 14 | 14_pSF421_SHROOM3_M3_GFP_TEV_10xHis | bacterial protein expression |
| 15 | 15_pSF421_SHROOM3_M4_GFP_TEV_10xHis | bacterial protein expression |
| 16 | 16_pSF421_SHROOM3_M2_M3_GFP_TEV_10xHis | bacterial protein expression |
| 17 | 17_pSF421_SHROOM3_M1_GFP_TEV_10xHis | bacterial protein expression |
| 18 | 18_pSF421_USP54_M1_GFP_TEV_10xHis | bacterial protein expression |
| 19 | 19_pSF421_USP54_M2_GFP_TEV_10xHis | bacterial protein expression |
| 20 | 20_pSF421_USP54_M3_GFP_TEV_10xHis | bacterial protein expression |
| 21 | 21_pSF421_USP54_M4_GFP_TEV_10xHis | bacterial protein expression |
| 22 | 22_pEGFP-N1 LifeAct_WT | transient eukaryotic expression |
| 23 | 23_pEGFP-N1 LifeAct_Mut | transient eukaryotic expression |
| 24 | 24_pEGFP-N1 ARHGEF11_WT | transient eukaryotic expression |
| 25 | 25_pEGFP-N1 ARHGEF11_Mut | transient eukaryotic expression |
| 26 | 26_pEGFP-N1 DENND1C_WT | transient eukaryotic expression |
| 27 | 27_pEGFP-N1 DENND1C_Mut | transient eukaryotic expression |
| 28 | 28_pEGFP-N1 DIXDC1_WT | transient eukaryotic expression |
| 29 | 29_pEGFP-N1 DIXDC1_Mut | transient eukaryotic expression |
| 30 | 30_pEGFP-N1 FGD1_WT | transient eukaryotic expression |
| 31 | 31_pEGFP-N1 FGD1_Mut | transient eukaryotic expression |
| 32 | 32_pEGFP-N1 FGD4_WT | transient eukaryotic expression |
| 33 | 33_pEGFP-N1 FGD4_Mut | transient eukaryotic expression |
| 34 | 34_pEGFP-N1 ITPKA_WT | transient eukaryotic expression |
| 35 | 35_pEGFP-N1 ITPKA_Mut | transient eukaryotic expression |
| 36 | 36_pEGFP-N1 ITPKA_FL_WT | transient eukaryotic expression |
| 37 | 37_pEGFP-N1 ITPKA_FL_Mut | transient eukaryotic expression |
| 38 | 38_pEGFP-N1 DIXDC1_FL_WT | transient eukaryotic expression |
| 39 | 39_pEGFP-N1 DIXDC1_FL_Mut | transient eukaryotic expression |
| 40 | 40_pEGFP-N1 FGD1_FL_WT | transient eukaryotic expression |
| 41 | 41_pEGFP-N1 FGD1_FL_Mut | transient eukaryotic expression |

**Supplementary Table 2.** Plasmidlist

| **No.** | **Name** | **5' - Sequence - 3'** | **Temp.** | **Elongation Time (min:sec)** | **Polymerase** | **Template Vector** | **Product Vector** | **Cloning Method** |
| --- | --- | --- | --- | --- | --- | --- | --- | --- |
| 1 | Fw_GFP-Control (P1) | TAAGCTTAATTAGCTGAGCTTGGACTC | 65 °C | 02:30 | Q5 | 1_pSF421-10xHis-GFP-TEV-ITPKA-FL | 2_pSF421_10xHis_GFP_TEV | KLD |
| 2 | Rv_GFP-Control (P2) | ATGGCCCTGAAAATAAAGATTCTCATC |
| 3 | Fw_GFP-Control (P3) | TCATTCAGGCCATCACCAtaCCGGaCACCACCATTAAGCTTAATTAGCTGAGCTTGGAC | 68 °C | 02:30 | Q5 | 2_pSF421_10xHis_GFP_TEV | 3_pSF421_10xHis_GFP_TEV_10xHis | KLD |
| 4 | Rv_GFP-Control (P4) | TGGTGATGCTTGCTGCTGCCGCCGCTGCCGCCGCCCTGAAAATAAAGATTCTCATCAGCC |
| 5 | Fw_GFP-Control (P5) | gtcgccaccAGCGTGAGCAAGGGCGCG | 69 °C | 02:30 | Q5 | 3_pSF421_10xHis_GFP_TEV_10xHis | 4_pSF421_GFP_TEV_10xHis | KLD |
| 6 | Rv_GFP-Control (P6) | cggtgggtcgccCATGgTTAATTTCTCCTCTTTAATGAATTCTGTGTGAAA |
| 7 | Fw_LifeactWT (P7) | AAAAAATTTGAGTCGATCTCGAAAGAAGAgggcgacccaccgg | 68 °C | 02:30 | Q5 | 4_pSF421_GFP_TEV_10xHis | 5_pSF421_Lifeact_WT_GFP_TEV_10xHis | KLD |
| 8 | Rv_LifeactWT (P8) | GATTAAATCGGCAACACCCATCATGgTTAATTTCTCCTCTTTAATGAATTCTGTGTG |
| 9 | Fw_LifeactMut (P9) | AAAAAAGCTGAGTCGATCTCGAAAGAAGAgggcgacccaccgg | 68 °C | 02:30 | Q5 | 4_pSF421_GFP_TEV_10xHis | 6_pSF421_Lifeact_Mut_GFP_TEV_10xHis | KLD |
| 10 | Rv_LifeactMut (P10) | GATTAAATCGGCaGCACCCATCATGgTTAATTTCTCCTCTTTAATGAATTCTGTGTG |
| 11 | Fw_ESPNL (P11) | GCGTGCGCACCCTGCGCGGCAACTTTGAAAGCGCGAGCGGCCCGCTGTGCggcgacccaccggtcgccac | 66 °C | 02:30 | Q5 | 4_pSF421_GFP_TEV_10xHis | 7_pSF421_ESPNL_GFP_TEV_10xHis | QuickChange-like |
| 12 | Rv_ESPNL (P12) | CGCAGGGTGCGCACGCTCACGCCCCATTCCTGAATCATGgTTAATTTCTCCTCTTTAATGAATTCTGT |
| 13 | Fw_SHROOM3 (P13) | GCGTGCTGGAAAAAGTGAGCAAATTTGAACAGCGCGAACAGGGCAGCCAGggcgacccaccggtcgccac | 66 °C | 02:30 | Q5 | 4_pSF421_GFP_TEV_10xHis | 8_pSF421_SHROOM3_GFP_TEV_10xHis | QuickChange-like |
| 14 | Rv_SHROOM3 (P14) | ACTTTTTCCAGCACGCTGCAATGCGGTTTGCCATACATGgTTAATTTCTCCTCTTTAATGAATTCTGT |
| 15 | Fw_USP54 (P15) | TGGTGCGCAGCCTGGCGGAACAGTTTCAGCGCATGCAGGGCGTGAGCATGggcgacccaccggtcgccac | 66 °C | 02:30 | Q5 | 4_pSF421_GFP_TEV_10xHis | 9_pSF421_USP54_GFP_TEV_10xHis | QuickChange-like |
| 16 | Rv_USP54 (P16) | GCCAGGCTGCGCACCAGGCCTTTGGTGCTCGGAAACATGgTTAATTTCTCCTCTTTAATGAATTCTGT |
| 17 | Fw_PPP1R9A (P17) | CCGTGAGCCAGCTGAGCGCGGTGTTTGAAAACACCGATAGCCCGAGCGCGggcgacccaccggtcgccac | 66 °C | 02:30 | Q5 | 4_pSF421_GFP_TEV_10xHis | 10_pSF421_PPP1R9A_GFP_TEV_10xHis | QuickChange-like |
| 18 | Rv_PPP1R9A (P18) | CTCAGCTGGCTCACGGTCGGGCTCACCGCTTCGGTCATGgTTAATTTCTCCTCTTTAATGAATTCTGT |
| 19 | Fw_CEFIP (P19) | AAGTGAGCACCCTGATTAAAAGCTTTGATCGCACCGAAAGCCAGCGCTGCggcgacccaccggtcgccac | 66 °C | 02:30 | Q5 | 4_pSF421_GFP_TEV_10xHis | 11_pSF421_CEFIP_GFP_TEV_10xHis | QuickChange-like |
| 20 | Rv_CEFIP (P20) | ATCAGGGTGCTCACTTTGCTCACCGGTTTGTTGCTCATGgTTAATTTCTCCTCTTTAATGAATTCTGT |
| 21 | Fw_CGNL (P21) | GCGTGGATCAGCTGATTGAAAAATTTGATCAGAAACCGGGCCTGCAGCGCggcgacccaccggtcgccac | 66 °C | 02:30 | Q5 | 4_pSF421_GFP_TEV_10xHis | 12_pSF421_CGNL_GFP_TEV_10xHis | QuickChange-like |
| 22 | Rv_CGNL (P22) | ATCAGCTGATCCACGCCCGGAATGCTGCCGGTATCCATGgTTAATTTCTCCTCTTTAATGAATTCTGT |
| 23 | Fw_SHROOM3_M2 (P23) | GCAAACCGCATTCCAGCGTGCTGG | 67 °C | 02:30 | Q5 | 8_pSF421_SHROOM3_GFP_TEV_10xHis | 13_pSF421_SHROOM3_M2_GFP_TEV_10xHis | QuickChange-like |
| 24 | Rv_SHROOM3_M2 (P24) | AATGCGGTTTGCCAATCATGGTTAATTTCTCCTC |
| 25 | Fw_SHROOM3_M3 (P25) | AGTGAGCAAATTTGAACAGCGC | 67 °C | 02:30 | Q5 | 8_pSF421_SHROOM3_GFP_TEV_10xHis | 14_pSF421_SHROOM3_M3_GFP_TEV_10xHis | QuickChange-like |
| 26 | Rv_SHROOM3_M3 (P26) | TCAAATTTGCTCACTAATTCCAGCACGCTG |
| 27 | Fw_SHROOM3_M4 (P27) | GCTCGCTGCCAGGGCAGCGCGggcgacccacc | 69 °C | 02:30 | Q5 | 8_pSF421_SHROOM3_GFP_TEV_10xHis | 15_pSF421_SHROOM3_M4_GFP_TEV_10xHis | QuickChange-like |
| 28 | Rv_SHROOM3_M4 (P28) | CTGGCAGCGAGCTTCAAATTTGCTCACTTTTTCCAGCAC |
|  | Fw_SHROOM3_M3 (P25) | AGTGAGCAAATTTGAACAGCGC | 67 °C | 02:30 | Q5 | 14_pSF421_SHROOM3_M2_GFP_TEV_10xHis | 16_pSF421_SHROOM3_M2_M3_GFP_TEV_10xHis | QuickChange-like |
|  | Rv_SHROOM3_M3 (P26) | TCAAATTTGCTCACTAATTCCAGCACGCTG |
|  | Fw_SHROOM3_M4 (P27) | GCTCGCTGCCAGGGCAGCGCGggcgacccacc | 69 °C | 02:30 | Q5 | 16_pSF421_SHROOM3_M2_M3_GFP_TEV_10xHis | 17_pSF421_SHROOM3_M1_GFP_TEV_10xHis | QuickChange-like |
| 29 | Rv_SHROOM3_M2 (P29) | CTGGCAGCGAGCTTCAAATTTGCTCACTAATTCCAGCAC |
| 30 | Fw_USP54_M1 (P30) | CCTGATCGAACAGTTTGAGCGCATACAGGGCGTGAGCGCGggcgacccacc | 72 °C | 02:30 | Q5 | 9_pSF421_USP54_GFP_TEV_10xHis | 18_pSF421_USP54_M1_GFP_TEV_10xHis | QuickChange-like |
| 31 | Rv_USP54_M1 (P31) | AACTGTTCGATCAGGCTGCGCACCGAGCCTTTGGTGCTCGGAATCATGgTTAATTTCTCC |
| 32 | Fw_USP54_M2 (P32) | GAGCACCAAAGGCTCGGTGCGCAGCCTG | 68 °C | 02:30 | Q5 | 9_pSF421_USP54_GFP_TEV_10xHis | 19_pSF421_USP54_M2_GFP_TEV_10xHis | QuickChange-like |
| 33 | Rv_USP54_M2 (P33) | CCTTTGGTGCTCGGAATCATGgTTAATTTCTCC |
| 34 | Fw_USP54_M3 (P34) | ATCGAACAGTTTGAGCGCATGCAGG | 63 °C | 02:30 | Q5 | 9_pSF421_USP54_GFP_TEV_10xHis | 20_pSF421_USP54_M3_GFP_TEV_10xHis | QuickChange-like |
| 35 | Rv_USP54_M3 (P35) | AAACTGTTCGATCAGGCTGCGCACC |
| 36 | Fw_USP54_M4 (P36) | TACAGGGCGTGAGCGCGggcgacccacc | 72 °C | 02:30 | Q5 | 9_pSF421_USP54_GFP_TEV_10xHis | 21_pSF421_USP54_M4_GFP_TEV_10xHis | QuickChange-like |
| 37 | Rv_USP54_M4 (P37) | TCACGCCCTGTATGCGCTGAAACTG |
| 38 | Fw_Lifeact_WT_EGFP-N1 (P38) | GAAGGGGATCCGGGTGCTGGTGCTGGTGCTGGTGCTATGGGCGTGAGCAAGGGCGAGG | 68 °C | 02:30 | Q5 | pEGFP-N1 from Addgene | 22_pEGFP-N1 LifeAct_WT | KLD |
| 39 | Rv_Lifeact_WT_EGFP-N1 (P39) | TTCCTTTGAGATGCTTTCGAATTTCTTGATCAAATCTGCGACACCCATGGTGGCGACCG |
| 40 | Fw_Lifeact_Mut_EGFP-N1 (P40) | caagaaagccgaaagcatctcAAAGGAAGAAGGGGATCCGGG | 70 °C | 02:30 | Q5 | 22_pEGFP-N1 LifeAct_WT | 23_pEGFP-N1 LifeAct_Mut | KLD |
| 41 | Rv_Lifeact_Mut_EGFP-N1 (P41) | atcaaatctgcggcacccatggTGGCGACCGGTGGATCCC |
| 42 | Fw_ARHGEF11_WT_EGFP-N1 (P42) | GAGGAACATCATCCAGCACTTCGAGAACAACCAGCAGTACGACGCCGGGGATCCGGGTGCTGGTG | 72 °C | 02:30 | Q5 | 22_pEGFP-N1 LifeAct_WT | 24_pEGFP-N1 ARHGEF11_WT | QuickChange-like |
| 43 | Rv_ARHGEF11_WT_EGFP-N1 (P43) | CTGGATGATGTTCCTCACGTTGCCGGGCTTCACCTCCACCATGGTGGCGACCGGTGGAT |
| 44 | Fw_ARHGEF11_Mut_EGFP-N1 (P44) | CAGGAACATCATCCAGCACGCCGAGAACAACCAGCAGTACGACGCCGGGGATCCGGGTGCTGGTG | 72 °C | 02:30 | Q5 | 22_pEGFP-N1 LifeAct_WT | 25_pEGFP-N1 ARHGEF11_Mut | QuickChange-like |
| 45 | Rv_ARHGEF11_Mut_EGFP-N1 (P45) | CTGGATGATGTTCCTGGCGTTGCCGGGCTTCACCTCCACCATGGTGGCGACCGGTGGAT |
| 46 | Fw_DENND1C_WT_EGFP-N1 (P46) | GGCCGACCTGAAGAAGTGCTTCGAGGGCGGGGATCCGGGTGCTGGTG | 72 °C | 02:30 | Q5 | 22_pEGFP-N1 LifeAct_WT | 26_pEGFP-N1 DENND1C_WT | QuickChange-like |
| 47 | Rv_DENND1C_WT_EGFP-N1 (P47) | CTTCTTCAGGTCGGCCACCCTGGGCCTGCTGCTGGGCTGCATGGTGGCGACCGGTGGAT |
| 48 | Fw_DENND1C_Mut_EGFP-N1 (P48) | CGCCGACCTGAAGAAGTGCGCCGAGGGCGGGGATCCGGGTGCTGGTG | 72 °C | 02:30 | Q5 | 22_pEGFP-N1 LifeAct_WT | 27_pEGFP-N1 DENND1C_Mut | QuickChange-like |
| 49 | Rv_DENND1C_Mut_EGFP-N1 (P49) | CTTCTTCAGGTCGGCGGCCCTGGGCCTGCTGCTGGGCTGCATGGTGGCGACCGGTGGAT |
| 50 | Fw_DIXDC1_WT_EGFP-N1 (P50) | GAGGGCCCTGGTGCAGCAGTACGAGGGCCAGCAGAGGAGCCCCAGCGGGGATCCGGGTGCTGGTG | 72 °C | 02:30 | Q5 | 22_pEGFP-N1 LifeAct_WT | 28_pEGFP-N1 DIXDC1_WT | QuickChange-like |
| 51 | Rv_DIXDC1_WT_EGFP-N1 (P51) | CTGCACCAGGGCCCTCACGCTCCAGTAGGGGTTCTCGATCATGGTGGCGACCGGTGGAT |
| 52 | Fw_DIXDC1_Mut_EGFP-N1 (P52) | CAGGGCCCTGGTGCAGCAGGCCGAGGGCCAGCAGAGGAGCCCCAGCGGGGATCCGGGTGCTGGTG | 72 °C | 02:30 | Q5 | 22_pEGFP-N1 LifeAct_WT | 29_pEGFP-N1 DIXDC1_Mut | QuickChange-like |
| 53 | Rv_DIXDC1_Mut_EGFP-N1 (P53) | CTGCACCAGGGCCCTGGCGCTCCAGTAGGGGTTCTCGATCATGGTGGCGACCGGTGGAT |
| 54 | Fw_FGD1_WT_EGFP-N1 (P54) | GCAGCCTGATCGAGAAGTTCGAGAGGGAGCCCGTGATCGTGGCCGGGGATCCGGGTGCTGGTG | 72 °C | 02:30 | Q5 | 22_pEGFP-N1 LifeAct_WT | 30_pEGFP-N1 FGD1_WT | QuickChange-like |
| 55 | Rv_FGD1_WT_EGFP-N1 (P55) | TTCTCGATCAGGCTGCTCACGGCGGCGCTGCTGGGGCTGGCCATGGTGGCGACCGGTGGAT |
| 56 | Fw_FGD1_Mut_EGFP-N1 (P56) | GCAGCCTGATCGAGAAGGCCGAGAGGGAGCCCGTGATCGTGGCCGGGGATCCGGGTGCTGGTG | 72 °C | 02:30 | Q5 | 22_pEGFP-N1 LifeAct_WT | 31_pEGFP-N1 FGD1_Mut | QuickChange-like |
| 57 | Rv_FGD1_Mut_EGFP-N1 (P57) | TTCTCGATCAGGCTGCTGGCGGCGGCGCTGCTGGGGCTGGCCATGGTGGCGACCGGTGGAT |
| 58 | Fw_FGD4_WT_EGFP-N1 (P58) | GAGCGACCTGATCAGCAGGTTCGAGGGCGGCAGCAGCCTGAGCAACGGGGATCCGGGTGCTGGTG | 72 °C | 02:30 | Q5 | 22_pEGFP-N1 LifeAct_WT | 32_pEGFP-N1 FGD4_WT | QuickChange-like |
| 59 | Rv_FGD4_WT_EGFP-N1 (P59) | GCTGATCAGGTCGCTCACCTTGCTGGGCTTCTCCTTGCTCATGGTGGCGACCGGTGGAT |
| 60 | Fw_FGD4_Mut_EGFP-N1 (P60) | CAGCGACCTGATCAGCAGGGCCGAGGGCGGCAGCAGCCTGAGCAACGGGGATCCGGGTGCTGGTG | 72 °C | 02:30 | Q5 | 22_pEGFP-N1 LifeAct_WT | 33_pEGFP-N1 FGD4_Mut | QuickChange-like |
| 61 | Rv_FGD4_Mut_EGFP-N1 (P61) | GCTGATCAGGTCGCTGGCCTTGCTGGGCTTCTCCTTGCTCATGGTGGCGACCGGTGGAT |
| 62 | Fw_ITPKA_WT_EGFP-N1 (P62) | GGGCGAGCTGAGGCTGCTGTTCGAGGCCAGGTGCGCCGCCGTGGCCGGGGATCCGGGTGCTGGTG | 72 °C | 02:30 | Q5 | 22_pEGFP-N1 LifeAct_WT | 34_pEGFP-N1 ITPKA_WT | QuickChange-like |
| 63 | Rv_ITPKA_WT_EGFP-N1 (P63) | CAGCCTCAGCTCGCCCACGCTCCTCCTGGGGGCCCTCTCCATGGTGGCGACCGGTGGAT |
| 64 | Fw_ITPKA_Mut_EGFP-N1 (P64) | CGGCGAGCTGAGGCTGCTGGCCGAGGCCAGGTGCGCCGCCGTGGCCGGGGATCCGGGTGCTGGTG | 72 °C | 02:30 | Q5 | 22_pEGFP-N1 LifeAct_WT | 35_pEGFP-N1 ITPKA_Mut | QuickChange-like |
| 65 | Rv_ITPKA_Mut_EGFP-N1 (P65) | CAGCCTCAGCTCGCCGGCGCTCCTCCTGGGGGCCCTCTCCATGGTGGCGACCGGTGGAT |
| 66 | Fw_openVec_EGFP-N1 (P66) | GGGGATCCGGGTGCTGG | 71 °C | 02:30 | Phusion | 22_pEGFP-N1 LifeAct_WT | Backbone for T4 Reactions | Backbone for T4 |
| 67 | Rv_openVec_EGFP-N1 (P67) | GGTGGCGACCGGTGG |
| 68 | Fw_ITPKA_FL_WT_EGFP-N1 (P68) | CCGCGGGCCCGGGATCCACCGGTCGCCACCATGACCCTGCCCGGG | 68 °C | 00:45 | Q5 | From Kuester et al. | 36_pEGFP-N1 ITPKA_FL_WT | Insert for T4 |
| 69 | Rv_ITPKA_FL_WT_EGFP-N1 (P69) | ACCAGCACCAGCACCAGCACCCGGATCCCCTCTCTCAGCCAGGCTGG |
| 70 | Fw_ITPKA_FL_Mut_EGFP-N1 (P70) | cgcctgctcgccGAGGCGCGCTGTGCGGCG | 72 °C | 03:00 | Q5 | 36_pEGFP-N1 ITPKA_FL_WT | 37_pEGFP-N1 ITPKA_FL_Mut | QuickChange-like |
| 71 | Rv_ITPKA_FL_Mut_EGFP-N1 (P71) | cagctccccggcACTCCTGCGCGGGGCCCG |
| 72 | Fw_DIXDC1_FL_WT_EGFP-N1 (P72) | CCGCGGGCCCGGGATCCACCGGTCGCCACCATGCTAGCCTGCCTGACC | 67 °C | 01:00 | Q5 | Gene Fragment ordered (IDT) | 38_pEGFP-N1 DIXDC1_FL_WT | Insert for T4 |
| 73 | Rv_DIXDC1_FL_WT_EGFP-N1 (P73) | ACCAGCACCAGCACCAGCACCCGGATCCCCATTCTCTCCATGGTCTTCTTCCAC |
| 74 | Fw_DIXDC1_FL_Mut_EGFP-N1 (P74) | gtgcagcaggccGAAGGGCAACAAAGGTCC | 63 °C | 03:30 | Q5 | 38_pEGFP-N1 DIXDC1_FL_WT | 39_pEGFP-N1 DIXDC1_FL_Mut | QuickChange-like |
| 75 | Rv_DIXDC1_FL_Mut_EGFP-N1 (P75) | tagggcccgcgcACTCCAGTATGGATTCTCAATTTC |
| 76 | Fw_FGD1_FL_WT_EGFP-N1 (P76) | CCGCGGGCCCGGGATCCACCGGTCGCCACCatgcatggccaccgagtcccg | 72 °C | 01:30 | Q5 | Addgene Plasmid #129612 | 40_pEGFP-N1 FGD1_FL_WT | Insert for T4 |
| 77 | Rv_FGD1_FL_WT_EGFP-N1 (P77) | ACCAGCACCAGCACCAGCACCCGGATCCCCGGTCTTGTCTCGGGTCTGGGAG |
| 78 | Fw_FGD1_FL_Mut_EGFP-N1 (P78) | attgagaaggctGAAAGAGAGCCTGTGATTG | 61 °C | 03:45 | Q5 | 40_pEGFP-N1 FGD1_FL_WT | 41_pEGFP-N1 FGD1_FL_Mut | QuickChange-like |
| 79 | Rv_FGD1_FL_Mut_EGFP-N1 (P79) | caatgatgatgcTGCTGCAGAACTAGTGCT |

**Supplementary Table 3.** Primerlist with PCR Conditions.

|  | F-actin−ITPKA  (EMDB: EMD-53133,PDB:9QGK) | F-actin  (EMDB: EMD-18866,PDB:8R3H) |
| --- | --- | --- |
| Data collection and processing | | |
| Microscope | Titan Krios | Titan Krios |
| Voltage (kV) | 300 | 300 |
| Detector | K3 | K3 |
| Magnification | 105K | 105K |
| Does per frame (e‒/Å2) | 1.28 | 1.28 |
| Calibrated pixel size (Å) | 0.826 | 0.826 |
| Defocus range (µm) | ‒0.8 to ‒3 | ‒0.8 to ‒3 |
| EM reconstruction method | HELICAL | HELICAL |
| Helical segments used for reconstruction | 65,917 | 128,335 |
| Initial applied helical symmetry | -166.5° (twist), 27.3Å (rise) | -166.5° (twist), 27.3Å (rise) |
| Final optimal helical symmetry | -166.86° (twist), 27.58Å (rise) | -166.75° (twist), 27.78Å (rise) |
| Map resolution (Å) | 2.97 | 3.13 |
| FSC threshold | 0.143 | 0.143 |
| Model building and refinement | | |
| Initial model (PDB ID) | 6T2012, 7BTI13 | 6T2012, 7BTI13 |
| Model composition | actin subunit(5), phalloidin(3), ITPKA actin binding domain(5) | actin subunit(5), phalloidin(3) |
| Ligands | Mg2+, ADP(5) | Mg2+,ADP(5) |
| Q-score | 0.5970 | 0.5930 |
| R.M.S. deviations | Length (0.002 Å) | Length (0.004 Å) |
| Angle (0.537°) | Angle (0.597°) |
| MolProbity score | 1.17 | 1.14 |
| Ramachandran plot | | |
| Favored (%) | 98.14 | 97.8 |
| Allowed (%) | 1.86 | 2.2 |
| Disallowed (%) | 0 | 0 |
| Rotamer outliers(%) | 0.06 | 0.19 |

**Supplementary Table 4.** Cryo-EM data collection, model refinement, and validation statistics.
