# Supplementary material for: Discovery of a new evolutionarily conserved short linear F-actin binding motif
Source: Research Square preprint supplement (doi:10.21203/rs.3.rs-6464525/v1), 2025-05-16
Supplement: Supplementary file 3 [file a7eea2c8ee8ee032aa3a01e0.docx]

| **Gene** | **Protein name** | **Uniprot ID** | **Start** | **End** | **Sequence** | **ipTM** | **Iteration** | **Comment** |
| --- | --- | --- | --- | --- | --- | --- | --- | --- |
| ABRA | actin-binding Rho-activating protein | Q8N0Z2 | 242 | 250 | VGNLKGRWQ | 0.86 | 1 | In line with our motif, F-actin binding shown by STARS [ABRA] by two regions AA 234–279 and AA 346–375.1 |
| AIF1L | allograft inflammatory factor 1-like | Q9BQI0 | 119 | 127 | VLKLVMMFE | 0.78 | 2 | No specific domain/motif analyzed, but F-Actin binding shown.2 |
| ANK2 | ankyrin-2 | Q01484 | 1990 | 1998 | VRELMKAFQ | 0.90 | 1 |  |
| ANK3 | ankyrin-3 | Q12955 | 2715 | 2723 | LSSIRLKFE | 0.64 | 3 |  |
| ANKLE1 | ankyrin repeat and LEM domain-containing protein 2 | Q86XL3 | 729 | 737 | VSDLTVEFD | 0.84 | 3 |  |
| ANKRD55 | ankyrin repeat domain-containing protein 55 | Q3KP44 | 378 | 386 | VNDIITTFD | 0.68 | 3 |  |
| ARHGAP11A | rho GTPase-activating protein 11A | Q6P4F7 | 808 | 816 | VSDHIQWFN | 0.84 | 3 |  |
| ARHGAP42 | rho GTPase-activating protein 42 | A6NI28 | 799 | 807 | VAAKAQLFE | 0.84 | 2 |  |
| ARHGEF11 | rho guanine nucleotide exchange factor 11 | O15085 | 565 | 573 | VRNIIQHFE | 0.90 | 1 | Validates our motif, F-actin binding shown by ARHGEF11 through AA 561-585.3 |
| ARHGEF15 | rho guanine nucleotide exchange factor 15 | O94989 | 150 | 158 | VRRLAGRFE | 0.84 | 1 |  |
| BCR | breakpoint cluster region protein | P11274 | 151 | 159 | VAALRSNFE | 0.85 | 1 |  |
| BRD10 | uncharacterized bromodomain-containing protein 10 | Q5HYC2 | 773 | 781 | LRELITKIE | 0.72 | 3 |  |
| CEFIP | cardiac-enriched FHL2-interacting protein | Q711Q0 | 143 | 151 | VSTLIKSFD | 0.89 | 1 |  |
| C4orf54 | uncharacterized protein C4orf54 | D6RIA3 | 1352 | 1360 | VSARAAAFE | 0.78 | 2 | No specific domain/motif analyzed, but F-Actin binding shown.4 |
| C6orf132 | uncharacterized protein C6orf132 | Q5T0Z8 | 563 | 571 | VRQIRNELE | 0.81 | 3 |  |
| C9orf152 | uncharacterized protein C9orf152 | Q5JTZ5 | 39 | 47 | IQFLRAQYE | 0.63 | 3 |  |
| CALD1 | caldesmon | Q05682 | 709 | 716 | VRNIKSMWE | 0.85 | 3 | Validates our motif, F-actin binding shown by Gallus CALD1 through AA 666-683. In Gallus CALD1 our Motif corresponds to 667-675.5 |
| CAMSAP2 | calmodulin-regulated spectrin-associated protein 2 | Q08AD1 | 845 | 853 | LADIKESME | 0.72 | 3 |  |
| CASKIN1 | caskin-1 | Q8WXD9 | 1001 | 1009 | VKSIAAMLE | 0.90 | 3 |  |
| CCDC14 | coiled-coil domain-containing protein 14 | Q49A88 | 453 | 461 | IQRLITEME | 0.73 | 3 |  |
| CCDC150 | coiled-coil domain-containing protein 150 | Q8NCX0 | 828 | 836 | IEALRKQFQ | 0.82 | 3 |  |
| CGN | cingulin | Q9P2M7 | 178 | 186 | VDSLINKFD | 0.90 | 1 | Validates our motif, F-actin binding shown by Xenopus CGN through AA 101-294. In Xenopus CGN our Motif corresponds to 267-275.6 |
| CGNL1 | cingulin-like protein 1 | Q0VF96 | 353 | 361 | VDQLIEKFD | 0.89 | 1 | No specific domain/motif analyzed, but F-Actin binding shown.7 |
| CTTN | src substrate cortactin | Q14247 | 347 | 355 | TSNIRANFE | 0.76 | 1 | Validates our motif, F-actin binding shown by CTTN by "helical domain". Corresponds approx. to AA 348-401.8 |
| CRYBG3 | very large A-kinase anchor protein | Q68DQ2 | 2045 | 2053 | RTDLVHHFE | 0.74 | 3 |  |
| DBNDD2 | dysbindin domain-containing protein 2 | Q9BQY9 | 114 | 122 | LRERQKFFE | 0.78 | 3 |  |
| DENND1A | DENN domain-containing protein 1A | Q8TEH3 | 998 | 1006 | VEQLRKQWE | 0.76 | 1 |  |
| DENND1C | DENN domain-containing protein 1C | Q8IV53 | 792 | 800 | VADLKKCFE | 0.76 | 1 | Validates our motif, F-actin binding shown by DENND1C through AA 786-801.9 |
| DENND2C | DENN domain-containing protein 2C | Q68D51 | 21 | 29 | IKQKISQWE | 0.87 | 3 |  |
| DIXDC1 | dixin | Q155Q3 | 198 | 206 | VRALVQQYE | 0.88 | 1 | Validates our motif, F-actin binding shown by DIXDC1 through AA 127-300.10 |
| DSP | desmoplakin | P15924 | 1203 | 1211 | MSNLRNKYE | 0.77 | 1 |  |
| DZIP1L | cilium assembly protein DZIP1L | Q8IYY4 | 671 | 679 | VQSMVKNLE | 0.84 | 2 |  |
| EML1 | echinoderm microtubule-associated protein-like 1 | O00423 | 33 | 41 | VTDRIASLE | 0.74 | 3 |  |
| ENKD1 | enkurin domain-containing protein 1 | Q9H0I2 | 74 | 82 | VGDVLLQLE | 0.72 | 1 |  |
| ESPN | espin isoform | A0A1B0GUN9 | 949 | 957 | VQHLRATYE | 0.88 | 2 |  |
| ESPNL | espin-like protein | Q6ZVH7 | 652 | 660 | VRTLRGNFE | 0.87 | 1 |  |
| FBXO34 | F-box only protein 34 | Q9NWN3 | 279 | 287 | VLDMVAKLE | 0.87 | 1 | No specific domain/motif analyzed, but F-Actin colocalization shown.11 |
| FGD1 | FYVE, RhoGEF and PH domain-containing protein 1 | P98174 | 211 | 219 | VSSLIEKFE | 0.89 | 1 | No specific domain/motif analyzed, but F-Actin colocalization shown.12 |
| FGD2 | FYVE, RhoGEF and PH domain-containing protein 2 | Q7Z6J4 | 12 | 20 | VSNLVTVFE | 0.87 | 1 |  |
| FGD4 | FYVE, RhoGEF and PH domain-containing protein 4 | Q96M96 | 20 | 28 | VSDLISRFE | 0.84 | 1 | Validates our motif, F-actin binding shown by FGD4 through AA 23-28.3 |
| FHOD3 | FH1/FH2 domain-containing protein 3 | Q2V2M9 | 745 | 753 | VKAFAEKFN | 0.67 | 3 |  |
| FYB2 | FYN-binding protein 2 | Q5VWT5 | 9 | 17 | FKELRAKFQ | 0.63 | 1 |  |
| HCLS1 | hematopoietic lineage cell-specific protein | P14317 | 235 | 243 | TRGLKAKFE | 0.71 | 1 | Validates our motif, F-actin binding shown by HCLS1 by "Coiled-coil domain". Corresponds to AA 215-280.13 |
| HOOK1 | protein Hook homolog 1 | Q9UJC3 | 517 | 525 | IRELQQQIE | 0.61 | 3 |  |
| IER5 | immediate early response gene 5 protein | Q5VY09 | 266 | 274 | VANLISIFG | 0.78 | 1 |  |
| IL16 | pro-interleukin-16 | Q14005 | 839 | 847 | IRQRISSFE | 0.76 | 2 |  |
| ITPKA | inositol-trisphosphate 3-kinase A | P23677 | 31 | 39 | VGELRLLFE | 0.87 | 1 | Validates our motif, F-actin binding shown by ITPKA through AA 9-52.14 |
| ITPKB | inositol-trisphosphate 3-kinase B | P27987 | 143 | 151 | VNQKVGMFE | 0.74 | 2 | Validates our motif, F-actin binding shown by ITPKB through AA 108-170.15 |
| ITPRID2 | protein ITPRID2 | P28290 | 169 | 177 | VSELLELYE | 0.74 | 2 | No specific domain/motif analyzed, but F-Actin colocalization shown.16 |
| KIF21B | kinesin-like protein KIF21B | O75037 | 866 | 874 | VSSIVRQWN | 0.90 | 1 | No specific domain/motif analyzed, but F-Actin colocalization shown.17 |
| KIF23 | kinesin-like protein KIF23 | Q02241 | 722 | 730 | VASCISEWE | 0.84 | 3 |  |
| LAD1 | ladinin-1 | O00515 | 438 | 446 | VASKRHLFE | 0.78 | 1 | No specific domain/motif analyzed, but F-Actin colocalization shown.18 |
| LCA5 | lebercilin | Q86VQ0 | 258 | 266 | LAERKRAYE | 0.66 | 3 |  |
| LETM1 | mitochondrial proton/calcium exchanger protein precursor | O95202 | 612 | 620 | VQQMIGQID | 0.73 | 2 |  |
| LIMA1 | LIM domain and actin-binding protein 1 | Q9UHB6 | 194 | 202 | LNRLKMMFE | 0.82 | 1 | In line with our motif, F-actin binding shown by LIMA1 by two regions, of which one is located N-terminally (AA 1-260).19 |
| LSP1 | lymphocyte-specific protein 1 | P33241 | 260 | 268 | VASTKSRWE | 0.85 | 3 | Our motif was not analyzed, but F-Actin colocalization shown by other actin binding domains (Caldesmon like binding domain and villin headpiece like binding domain).20,21 |
| METTL25 | probable methyltransferase-like protein 25 | Q8N6Q8 | 286 | 294 | ISNIRNQME | 0.65 | 2 |  |
| MTUS2 | microtubule-associated tumor suppressor candidate 2 | Q5JR59 | 506 | 514 | VAENRNLLE | 0.71 | 1 |  |
| MYO15B | myosin XVB | Q96JP2 | 2147 | 2155 | IGNIIRMYQ | 0.61 | 1 |  |
| MYO18A | unconventional myosin-XVIIIa | Q92614 | 1685 | 1693 | IAQLKNQLE | 0.69 | 1 |  |
| N4BP1 | NEDD4-binding protein 1 | O75113 | 244 | 252 | VSELTKQMD | 0.80 | 1 |  |
| NAV2 | neuron navigator 2 | Q8IVL1 | 753 | 761 | IADLRQNLE | 0.67 | 1 | No specific domain/motif analyzed, but F-Actin binding shown.22 |
| NAV3 | neuron navigator 3 | Q8IVL0 | 689 | 697 | IADLRQNLE | 0.71 | 1 | No specific domain/motif analyzed, but F-Actin binding shown.22 |
| NIN | ninein | Q8N4C6 | 755 | 763 | VRGLTQELE | 0.86 | 3 |  |
| OPHN1 | oligophrenin-1 | O60890 | 776 | 784 | VASRTRFFE | 0.87 | 2 | Validates our motif, F-actin binding shown by Oligophrenin through AA 677-802.23 |
| PCDH15 | protocadherin-15 | Q96QU1 | 1724 | 1731 | IETERNIFE | 0.64 | 3 |  |
| PDZD2 | PDZ domain-containing protein 2 | O15018 | 2335 | 2343 | VKQRIKSFE | 0.85 | 2 |  |
| PEAK1 | inactive tyrosine-protein kinase PEAK1 | Q9H792 | 702 | 710 | VAQKVQEFN | 0.79 | 3 | Validates our motif, F-actin binding shown by inactive tyrosine-protein kinase PEAK1 through AA 339-727. 24 |
| PHC2 | polyhomeotic-like protein 2 | Q8IXK0 | 594 | 602 | VGNLKKKYA | 0.68 | 1 |  |
| PLCB2 | 1-phosphatidylinositol 4,5-bisphosphate phosphodiesterase beta-2 | Q00722 | 1040 | 1048 | TKEMKKKLE | 0.75 | 3 |  |
| PLEKHD1 | pleckstrin homology domain-containing family D member 1 | A6NEE1 | 396 | 404 | VSHLKRFFE | 0.83 | 2 |  |
| PLEKHG2 | pleckstrin homology domain-containing family G member 2 | Q9H7P9 | 817 | 825 | VRELARLYS | 0.83 | 2 |  |
| PLEKHG3 | pleckstrin homology domain-containing family G member 3 | A1L390 | 1205 | 1213 | VRNLREKFQ | 0.74 | 1 | | Validates our motif. F-actin binding suggested for AA 910 to 940. The others could not be found due to limited truncation design; By elongating the  N terminus from 1 to 910 (instead of 1- to 600), one could have possibly still  observed an actin binding (probably mediated by region 750 - 758). The same accounts for the C terminal truncations, where a construct from 940 - 1219  would also probably still show actin binding (instead of 940 - 1100).25 | | --- | |  | |  | |
| 926 | 934 | VYQLARQYS | 0.84 | 3 |
| 750 | 758 | VRNSISRFN | 0.87 | 3 |
| PPP1R9A | neurabin-1 | Q9ULJ8 | 139 | 147 | FTETRKMFE | 0.88 | 1 | | Validates our motif, F-actin binding shown by Neurabin-1 through AA 1-144.26 | | --- | |  | |  | |
| 202 | 210 | VSQLSAVFE | 0.87 | 1 |
| 120 | 128 | VSERISRFD | 0.85 | 1 |
| PPP1R9B | neurabin-2 | Q96SB3 | 144 | 152 | LQETRKLFE | 0.62 | 1 | | Validates our motif, F-actin binding shown by Neurabin-2 through 2 regions,  AA 1-154 and AA 151-282.27 | | --- | |  | |
| 208 | 216 | VSQLSAVFE | 0.88 | 1 |
| PPRC1 | peroxisome proliferator-activated receptor gamma coactivator-related protein 1 | Q5VV67 | 1172 | 1180 | LSSLLEQFE | 0.60 | 1 |  |
| PXN | paxillin | P49023 | 217 | 225 | VESLLDELE | 0.79 | 3 |  |
| RAMAC | RNA guanine-N7 methyltransferase activating subunit | Q9BTL3 | 4 | 12 | TAEAVPKFE | 0.85 | 1 |  |
| RAPH1 | ras-associated and pleckstrin homology domains-containing protein 1 | Q70E73 | 862 | 870 | VKQIASQFP | 0.72 | 3 |  |
| RCSD1 | capZ-interacting protein | Q6JBY9 | 20 | 28 | VAQLAGRFR | 0.84 | 1 |  |
| ROCK1 | rho-associated protein kinase 1 | Q13464 | 769 | 777 | VKNLTLQLE | 0.70 | 3 |  |
| SEPTIN9 | septin-9 isoform 7 | Q9UHD8-7 | 5 | 13 | YSALKRSFE | 0.60 | 1 | Validates our motif, F-actin binding shown by Septin-9 through AA 1-143.28 |
| SETD2 | histone-lysine N-methyltransferase SETD2 | Q9BYW2 | 2118 | 2126 | TEERRKLFE | 0.79 | 1 | No binding shown, but methylates actin.29 |
| SH2D4B | SH2 domain-containing protein 4B | Q5SQS7 | 247 | 255 | VAGLSSMFR | 0.87 | 1 |  |
| SH2D7 | SH2 domain-containing protein 7 | A6NKC9 | 119 | 127 | LAELVHHYQ | 0.63 | 3 |  |
| SHROOM3 | protein Shroom3 | Q8TF72 | 781 | 789 | VLEKVSKFE | 0.86 | 1 | In line with our motif, F-actin binding shown by Shroom3 throughout the ASD1 region, which incorporated one part of our identified motif (AA 1054 - 1062).30,31 |
| 1054 | 1062 | VADRRRLFE | 0.84 | 1 |
| SORBS1 | sorbin and SH3 domain-containing protein 1 isoform 26 | Q9BX66-12 | 657 | 665 | VRDLASHFE | 0.85 | 2 |  |
| 691 | 699 | VSSRITAFE | 0.87 | 1 |  |
| SORBS2 | sorbin and SH3 domain-containing protein 2 | O94875 | 473 | 481 | VKSRILQYE | 0.87 | 3 | | No specific domain/motif analyzed, but F-Actin colocalization shown.32 | | --- | |  | |
| 506 | 514 | VPTRISEFE | 0.89 | 3 |
| SPECC1 | cytospin-B | Q5M775 | 820 | 828 | VKSLIKSFD | 0.86 | 1 | F-Actin colocalization shown, but thought to be mediated over other motifs (WH2).33 |
| SPECC1L | cytospin-A | Q69YQ0 | 841 | 849 | VKTLIKSFD | 0.89 | 1 | F-Actin colocalization shown, but thought to be mediated over other motifs (WH2).33 |
| SPEG | striated muscle preferentially expressed protein kinase | Q15772 | 400 | 408 | ILDKLQFFE | 0.76 | 1 |  |
| SSH2 | protein phosphatase Slingshot homolog 2 | Q76I76 | 866 | 874 | VRRATLEFE | 0.83 | 3 | | No specific domain/motif analyzed, but F-Actin binding shown.34 | | --- | |  | |
| 749 | 757 | VKEIVTEIE | 0.83 | 3 |
| SSH3 | protein phosphatase Slingshot homolog 3 | Q8TE77 | 612 | 620 | VANRTQAFQ | 0.68 | 2 | No specific domain/motif analyzed, but F-Actin binding shown.34 |
| STRN | striatin | O43815 | 329 | 337 | ITKLKEQYK | 0.82 | 3 |  |
| SVIL | supervillin | O95425 | 594 | 602 | VAQLRSAFL | 0.69 | 1 | F-Actin colocalization shown, but thought to be mediated over other domains.35–37 |
| SYCP1 | synaptonemal complex protein 1 | Q15431 | 218 | 226 | IEKMITAFE | 0.70 | 2 |  |
| TET3 | methylcytosine dioxygenase TET3 | Q8BG87 | 715 | 723 | LEELIRQFE | 0.75 | 1 |  |
| TIAM2 | rho guanine nucleotide exchange factor TIAM2 | Q8IVF5 | 296 | 304 | LSSLRELYK | 0.70 | 3 |  |
| TJP1 | tight junction protein ZO-1 | Q07157 | 1264 | 1272 | VLTRVKMFE | 0.90 | 3 | Validates our motif, F-actin binding shown by tight junction protein ZO-1 through AA 1257-1284.38 |
| TPRN | taperin | Q4KMQ1 | 133 | 141 | VSRLLERFD | 0.72 | 1 |  |
| USP54 | ubiquitin carboxyl-terminal hydrolase 54 | Q70EL1 | 1129 | 1137 | VRSLAEQFQ | 0.88 | 1 |  |
| XIRP1 | xin actin-binding repeat-containing protein 1 | Q702N8 | 693 | 701 | VSRQKEVFQ | 0.82 | 3 | | Validates our motif: defined in this study as a novel, repetitive actin-binding motif present in at least two different muscle proteins. 39 | | --- | |  | |  | |  | |  | |  | |  | |  | |  | |  | |  | |  | |  | |  | |
| 123 | 131 | VQATSRKFE | 0.88 | 2 |
| 91 | 99 | VQCMRWIFE | 0.86 | 3 |
| 342 | 350 | VQQQQHLFE | 0.79 | 1 |
| 438 | 446 | **VKTFKNLFE** | 0.87 | 2 |
| 1491 | 1499 | **VQALRRLFE** | 0.79 | 3 |
| 547 | 555 | VGTARWLFE | 0.85 | 1 |
| 153 | 161 | **VRAARWLFE** | 0.85 | 3 |
| 591 | 599 | VQTIRWLFE | 0.89 | 1 |
| XIRP2 | xin actin-binding repeat-containing protein 2 | A4UGR9 | 399 | 407 | **VQSIRWIFE** | 0.88 | 2 |
| ´1243 | 1251 | **VKTSRQFFE** | 0.87 | 3 |
| 187 | 195 | **TKLLKEQFE** | 0.82 | 3 |
| 364 | 372 | **VQQARYVFE** | 0.79 | 3 |
| XIRP2 | xin actin-binding repeat-containing protein 2 isoform 4 | A4UGR9 | 114 | 122 | **LDELRSVFE** | 0.78 | 1 |

**Table 1. Proteins identified by the SLiMFold pipeline as containing the short linear F-actin–binding motif (SFM).** Each entry includes the gene symbol, protein name, UniProt ID, motif boundaries (Start–End), SFM sequence, the mean ipTM (averaged from the top three SLiMFold models), the SLiMFold iteration in which it was identified, and a brief comment providing functional insight or references.

**References**

1. Arai, A., Spencer, J. A. & Olson, E. N. STARS, a Striated Muscle Activator of Rho Signaling and Serum Response Factor-dependent Transcription. *Journal of Biological Chemistry* **277**, 24453–24459 (2002).

2. Schulze, J. O. *et al.* Structural and functional characterization of human Iba proteins. *The FEBS Journal* **275**, 4627–4640 (2008).

3. Banerjee, J., Fischer, C. C. & Wedegaertner, P. B. The Amino Acid Motif L/IIxxFE Defines a Novel Actin-Binding Sequence in PDZ-RhoGEF. *Biochemistry* **48**, 8032–8043 (2009).

4. Boeynaems, S. *et al.* Aberrant phase separation is a common killing strategy of positively charged peptides in biology and human disease. Preprint at https://doi.org/10.1101/2023.03.09.531820 (2023).

5. Zhan, Q. Q., Wong, S. S. & Wang, C. L. A calmodulin-binding peptide of caldesmon. *Journal of Biological Chemistry* **266**, 21810–21814 (1991).

6. D’Atri, F. & Citi, S. Cingulin interacts with F-actin in vitro. *FEBS Letters* **507**, 21–24 (2001).

7. Chrifi, I. *et al.* Cgnl1, an endothelial junction complex protein, regulates GTPase mediated angiogenesis. *Cardiovascular Research* **113**, 1776–1788 (2017).

8. Scherer, A. N., Anand, N. S. & Koleske, A. J. Cortactin stabilization of actin requires actin-binding repeats and linker, is disrupted by specific substitutions, and is independent of nucleotide state. *Journal of Biological Chemistry* **293**, 13022–13032 (2018).

9. Marat, A. L., Ioannou, M. S. & McPherson, P. S. Connecdenn 3/DENND1C binds actin linking Rab35 activation to the actin cytoskeleton. *MBoC* **23**, 163–175 (2012).

10. Wang, X. *et al.* DIXDC1 isoform, l-DIXDC1, is a novel filamentous actin-binding protein. *Biochemical and Biophysical Research Communications* **347**, 22–30 (2006).

11. Zhao, B.-W. *et al.* FBXO34 Regulates the G2/M Transition and Anaphase Entry in Meiotic Oocytes. *Front. Cell Dev. Biol.* **9**, 647103 (2021).

12. Estrada, L. Fgd1, the Cdc42 guanine nucleotide exchange factor responsible for faciogenital dysplasia, is localized to the subcortical actin cytoskeleton and Golgi membrane. *Human Molecular Genetics* **10**, 485–495 (2001).

13. Hao, J.-J., Zhu, J., Zhou, K., Smith, N. & Zhan, X. The Coiled-coil Domain Is Required for HS1 to Bind to F-actin and Activate Arp2/3 Complex. *Journal of Biological Chemistry* **280**, 37988–37994 (2005).

14. Johnson, H. W. & Schell, M. J. Neuronal IP3 3-Kinase is an F-actin–bundling Protein: Role in Dendritic Targeting and Regulation of Spine Morphology. *MBoC* **20**, 5166–5180 (2009).

15. Brehm, M. A., Schreiber, I., Bertsch, U., Wegner, A. & Mayr, G. W. Identification of the actin-binding domain of Ins(1,4,5) *P* 3 3-kinase isoform B (IP3K-B). *Biochemical Journal* **382**, 353–362 (2004).

16. Inokuchi, J. *et al.* Deregulated expression of KRAP, a novel gene encoding actin-interacting protein, in human colon cancer cells. *J Hum Genet* **49**, 46–52 (2004).

17. Rivera Alvarez, J. *et al.* The kinesin Kif21b regulates radial migration of cortical projection neurons through a non-canonical function on actin cytoskeleton. *Cell Reports* **42**, 112744 (2023).

18. Abé, T. *et al.* Ladinin-1 in actin arcs of oral squamous cell carcinoma is involved in cell migration and epithelial phenotype. *Sci Rep* **14**, 22778 (2024).

19. Maul, R. S. *et al.* EPLIN regulates actin dynamics by cross-linking and stabilizing filaments. *The Journal of Cell Biology* **160**, 399–407 (2003).

20. Wong, M. J., Malapitan, I. A., Sikorski, B. A. & Jongstra, J. A cell-free binding assay maps the LSP1 cytoskeletal binding site to the COOH-terminal 30 amino acids. *Biochimica et Biophysica Acta (BBA) - Molecular Cell Research* **1642**, 17–24 (2003).

21. Cervero, P., Wiesner, C., Bouissou, A., Poincloux, R. & Linder, S. Lymphocyte-specific protein 1 regulates mechanosensory oscillation of podosomes and actin isoform-based actomyosin symmetry breaking. *Nat Commun* **9**, 515 (2018).

22. Sandeep, P. *et al.* Neuron navigators: A novel frontier with physiological and pathological implications. *Molecular and Cellular Neuroscience* **127**, 103905 (2023).

23. Fauchereau, F. The RhoGAP activity of OPHN1, a new F-actin-binding protein, is negatively controlled by its amino-terminal domain. *Molecular and Cellular Neuroscience* **23**, 574–586 (2003).

24. Kelber, J. A. & Klemke, R. L. PEAK1, a Novel Kinase Target in the Fight Against Cancer. *Oncotarget* **1**, 219–223 (2010).

25. Nguyen, T. T. T. *et al.* PLEKHG3 enhances polarized cell migration by activating actin filaments at the cell front. *Proc. Natl. Acad. Sci. U.S.A.* **113**, 10091–10096 (2016).

26. Oliver, C. J. *et al.* Targeting Protein Phosphatase 1 (PP1) to the Actin Cytoskeleton: the Neurabin I/PP1 Complex Regulates Cell Morphology. *Molecular and Cellular Biology* **22**, 4690–4701 (2002).

27. Barnes, A. P., Smith, F. D., VanDongen, H. M., VanDongen, A. M. J. & Milgram, S. L. The identification of a second actin-binding region in spinophilin/neurabin II. *Molecular Brain Research* **124**, 105–113 (2004).

28. Smith, C. *et al.* Septin 9 Exhibits Polymorphic Binding to F-Actin and Inhibits Myosin and Cofilin Activity. *Journal of Molecular Biology* **427**, 3273–3284 (2015).

29. Maas, M. N. *et al.* Examining prestructured β-actin peptides as substrates of histidine methyltransferase SETD3. *Sci Rep* **14**, 26439 (2024).

30. Hildebrand, J. D. & Soriano, P. Shroom, a PDZ Domain–Containing Actin-Binding Protein, Is Required for Neural Tube Morphogenesis in Mice. *Cell* **99**, 485–497 (1999).

31. Yeo, N. C. *et al.* *Shroom3* contributes to the maintenance of the glomerular filtration barrier integrity. *Genome Res.* **25**, 57–65 (2015).

32. Fredriksson-Lidman, K., Van Itallie, C. M., Tietgens, A. J. & Anderson, J. M. Sorbin and SH3 domain-containing protein 2 (SORBS2) is a component of the acto-myosin ring at the apical junctional complex in epithelial cells. *PLoS ONE* **12**, e0185448 (2017).

33. Mehta, V. *et al.* SPECC1L binds the myosin phosphatase complex MYPT1/PP1β and can regulate its distribution between microtubules and filamentous actin. *Journal of Biological Chemistry* **299**, 102893 (2023).

34. Niwa, R., Nagata-Ohashi, K., Takeichi, M., Mizuno, K. & Uemura, T. Control of Actin Reorganization by Slingshot, a Family of Phosphatases that Dephosphorylate ADF/Cofilin. *Cell* **108**, 233–246 (2002).

35. Chen, Y. *et al.* F-actin and Myosin II Binding Domains in Supervillin. *Journal of Biological Chemistry* **278**, 46094–46106 (2003).

36. Pestonjamasp, K. N., Pope, R. K., Wulfkuhle, J. D. & Luna, E. J. Supervillin (p205): A Novel Membrane-associated, F-Actin–binding Protein in the Villin/Gelsolin Superfamily. *The Journal of Cell Biology* **139**, 1255–1269 (1997).

37. Wulfkuhle, J. D. *et al.* Domain analysis of supervillin, an F-actin bundling plasma membrane protein with functional nuclear localization signals. *Journal of Cell Science* **112**, 2125–2136 (1999).

38. Belardi, B. *et al.* A Weak Link with Actin Organizes Tight Junctions to Control Epithelial Permeability. *Developmental Cell* **54**, 792-804.e7 (2020).

39. Pacholsky, D. *et al.* Xin repeats define a novel actin-binding motif. *Journal of Cell Science* **117**, 5257–5268 (2004).
